# Supplementary material
Source: PubMed Central journal article supplement (PMC10169969)
Supplement: 12264_2022_1011_MOESM1_ESM.pdf [file 12264_2022_1011_MOESM1_ESM.pdf]

## Supplementary Materials

### Supplementary Figures and Figure Legends

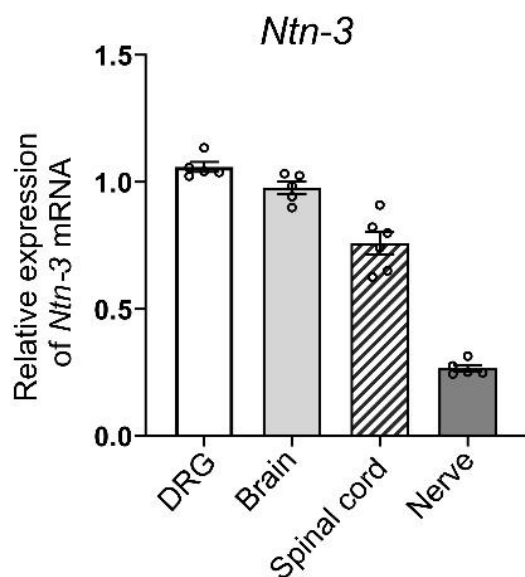

**Fig. S1** *Ntn-3* expression pattern in adult mice. qPCR analysis show that *Ntn-3* is expressed in multiple neural tissues of the adult mouse.  $n = 5-6$  mice.

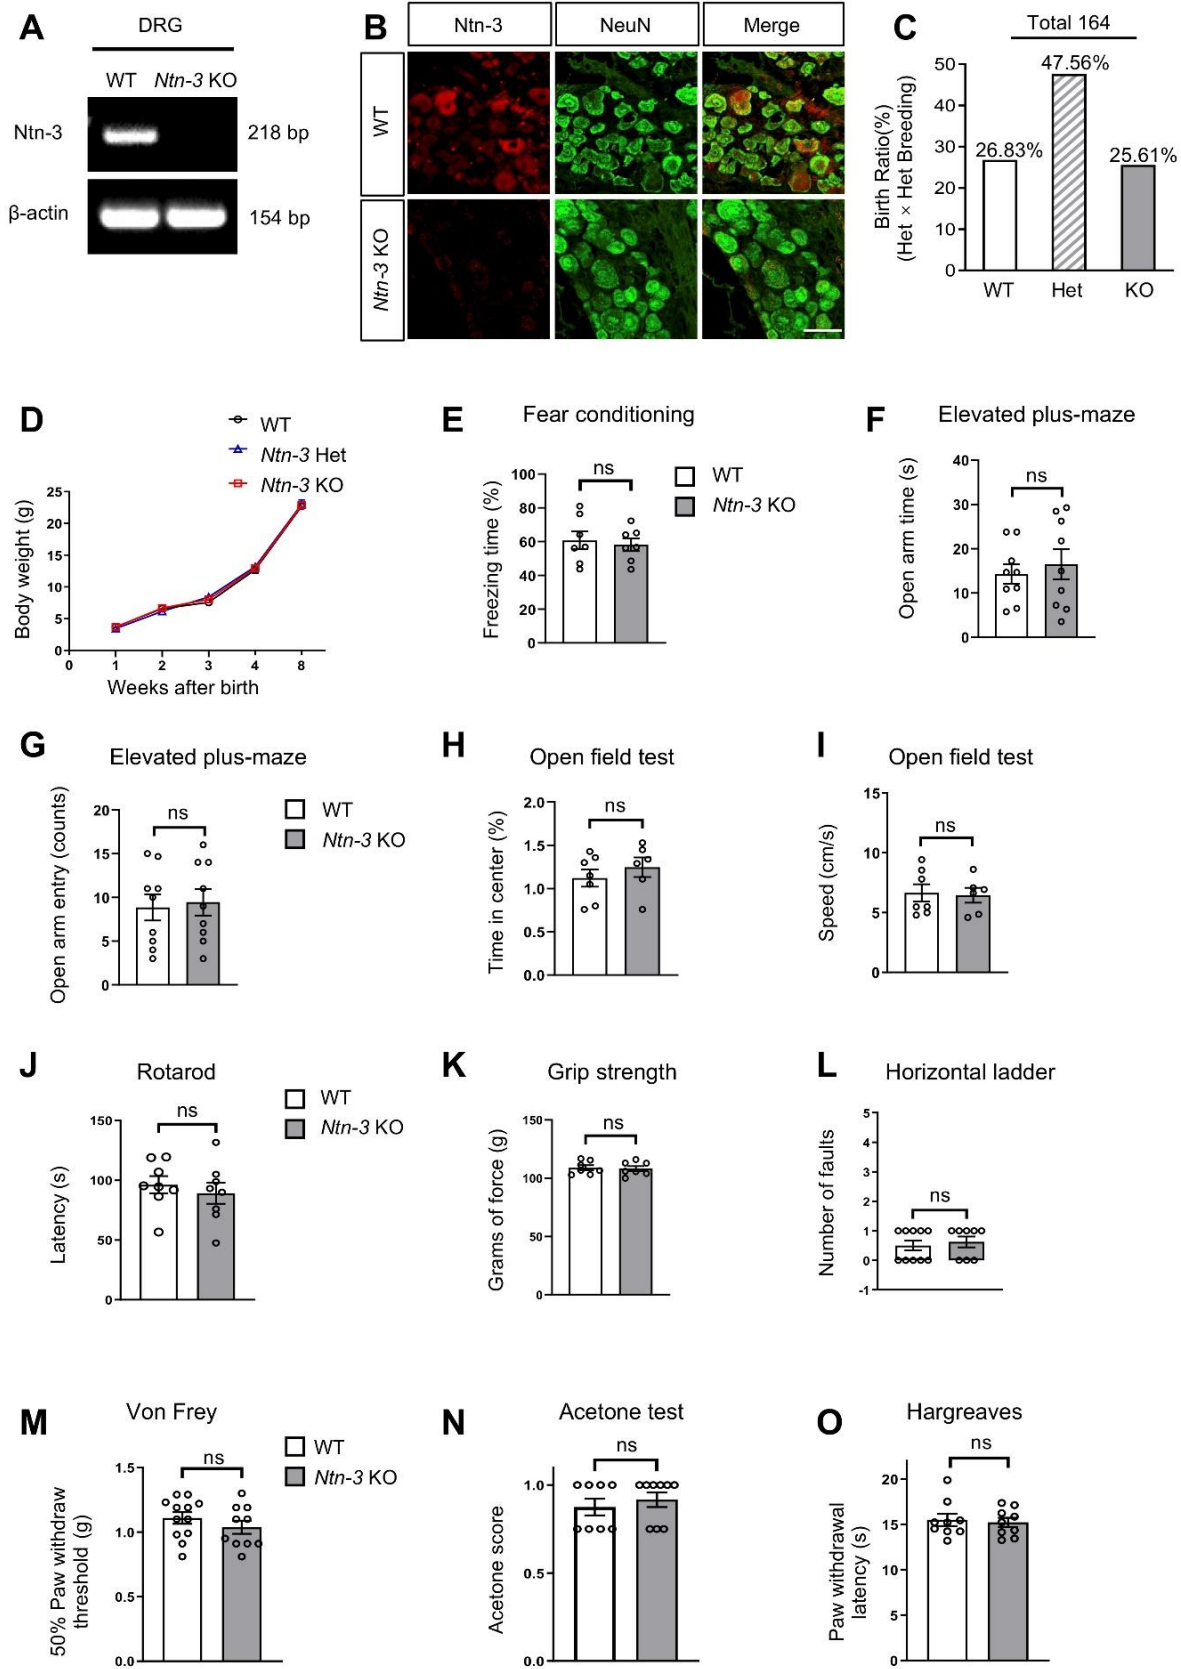

**Fig. S2** *Ntn-3* KO mice show no developmental and behavioral defects. **A, B** *Ntn-3* mRNA (**A**) and protein (**B**) are absent in *Ntn-3* KO DRGs. Scale bar, 50  $\mu$ m. **C** Genotype analysis of 164 offspring of *Ntn-3* heterozygotic (Het) breeding pairs. The birth ratio of each genotype is consistent with Mendel's law. **D** No significant difference in body weights occurs among the different genotypes,  $n = 8$  mice per group. **E–O** The behavioral performance of *Ntn-3* KO mice is similar to that of WT littermates. Contextual fear conditioning presented as the percentage of time spent freezing during the 5-min contextual fear conditioning test (**E**); anxiety-related emotional behaviors in the elevated plus maze (**F**, **G**) and open field maze tests (**H**); locomotor ability indicated by movement speed in the open field maze (**I**); coordination indicated by latency to fall during the accelerating rotarod test (**J**); muscle strength indicated by forelimb grip strength (**K**); and proprioceptive function, as tested *via* the horizontal ladder (**L**). *Ntn-3* KO mice perform normally for sensory sensitivity in the mechanical allodynia (**M**), cold allodynia (**N**), and thermal hyperalgesia (**O**) tests. ns, no significant difference by Student's *t*-test.  $n = 6–17$  per group (**E–O**).

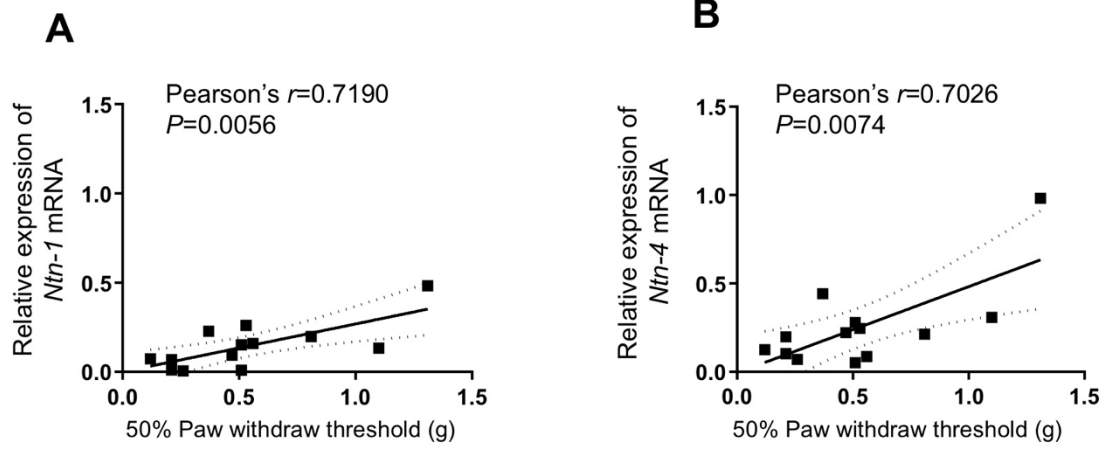

**Fig. S3** mRNA expression of *Ntn-1* and *Ntn-4* in diabetic mice. **A, B** Correlation of *Ntn-1* (**A**) and *Ntn-4* (**B**) mRNA levels with mechanical allodynia threshold in diabetic mice.  $n = 13$  mice.

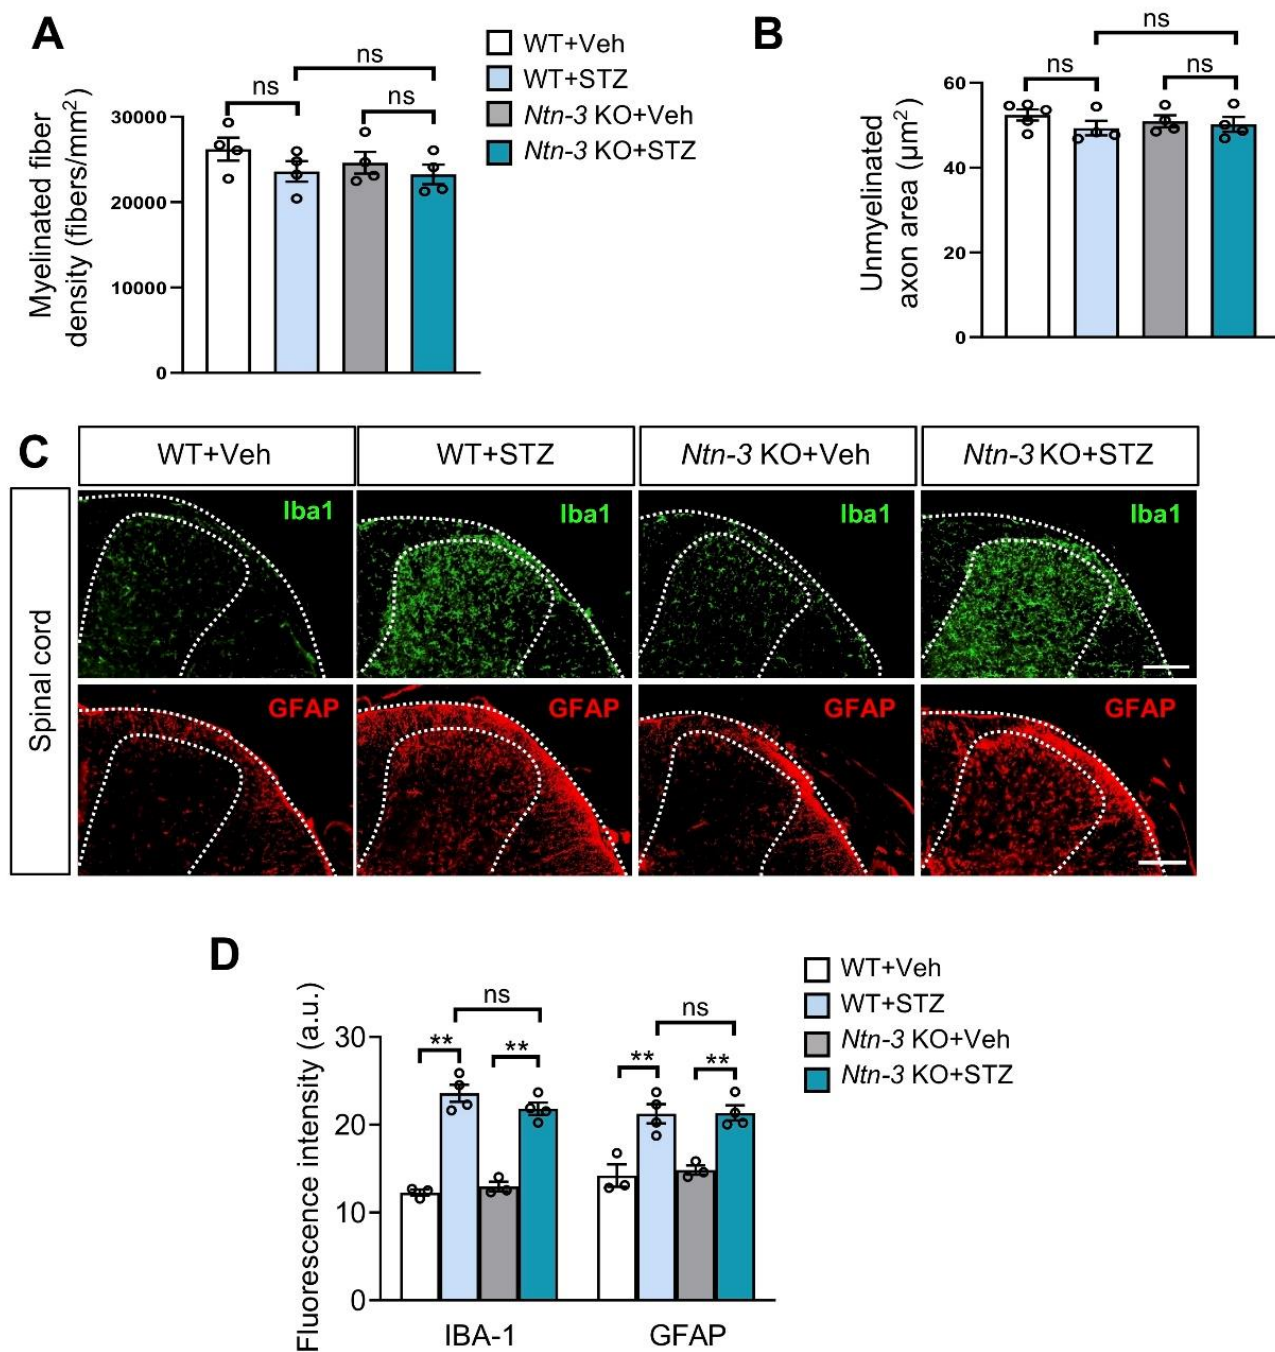

**Fig. S4** *Ntn-3* deficiency has no effect on DNP-associated peripheral axon loss and spinal cord gliosis. **A, B** Myelinated fiber density (**A**) and unmyelinated axon-covered areas (**B**) indicate no significant axon loss in either diabetic *Ntn-3* KO or WT groups. ns, no significant difference by two-way ANOVA.  $n = 4$  sections from 2–3 mice per group. **C** Immunostaining of Iba-1 and GFAP in the spinal cords of WT and

*Ntn-3* KO mice 4 weeks after STZ administration. Scale bars, 200  $\mu\text{m}$ . **D** Activation of glial cells in the dorsal horn of the mouse spinal cord quantified by ImageJ and presented as fluorescence intensity (arbitrary units, a.u.). No significant difference in microglia and astrocyte activation is found between diabetic WT and *Ntn-3* KO mice.  $**P < 0.01$ ; ns, no significant difference by two-way ANOVA.  $n = 3-4$  mice per group.

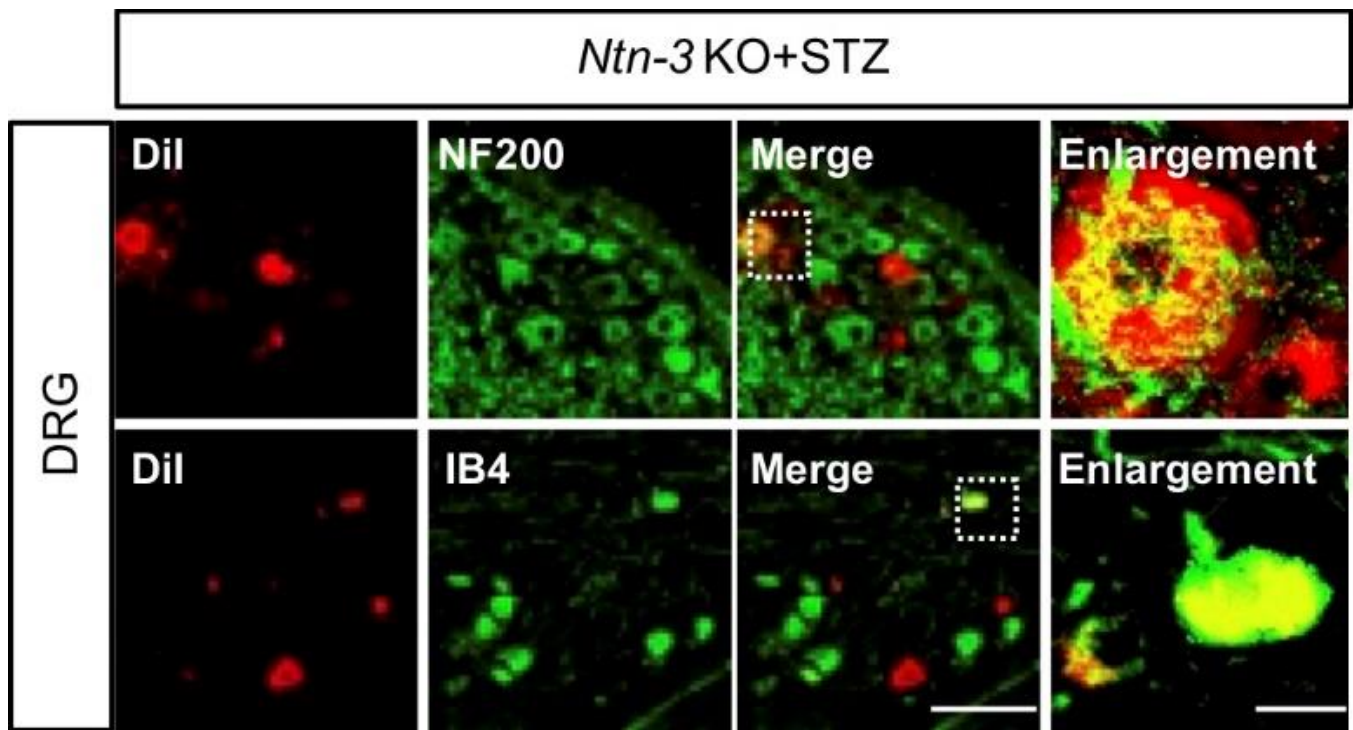

**Fig. S5** NF200<sup>+</sup> and IB4<sup>+</sup> sensory neurons in DRGs retrogradely labeled by Dil. Representative images of NF200, IB4, and Dil labeling in DRG neurons of diabetic *Ntn-3* KO mice. Scale bar, 100  $\mu\text{m}$ . Boxed regions of the merged images are enlarged on the right. Scale bar, 15  $\mu\text{m}$ .

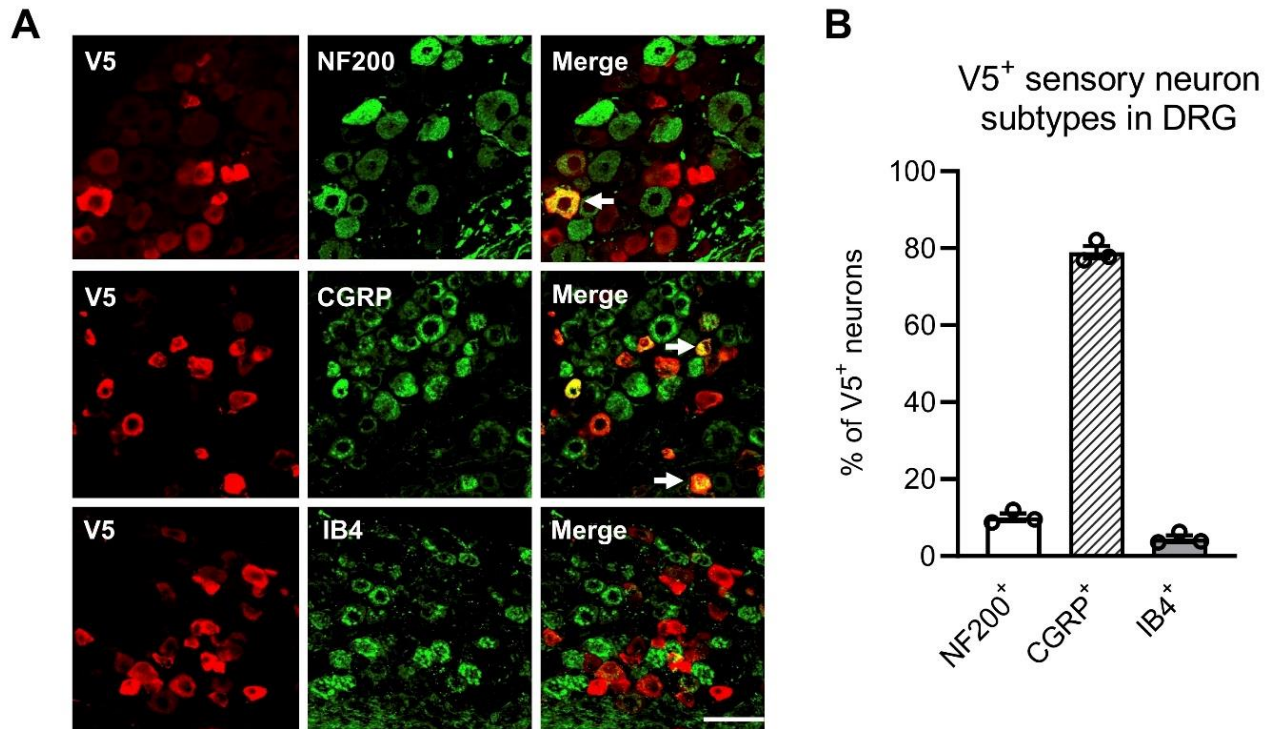

**Fig. S6** AAV-induced Ntn-3 overexpression predominantly in CGRP<sup>+</sup> neurons. **A** Co-immunostaining of V5 and neuronal subtype markers in mouse DRGs. V5-tagged exogenous Ntn-3 is predominantly expressed in CGRP<sup>+</sup> neurons (arrows). Scale bar, 50  $\mu$ m. **B** Percentages of total V5<sup>+</sup> neurons expressing NF200, CGRP, and IB4.  $n = 3$  mice.

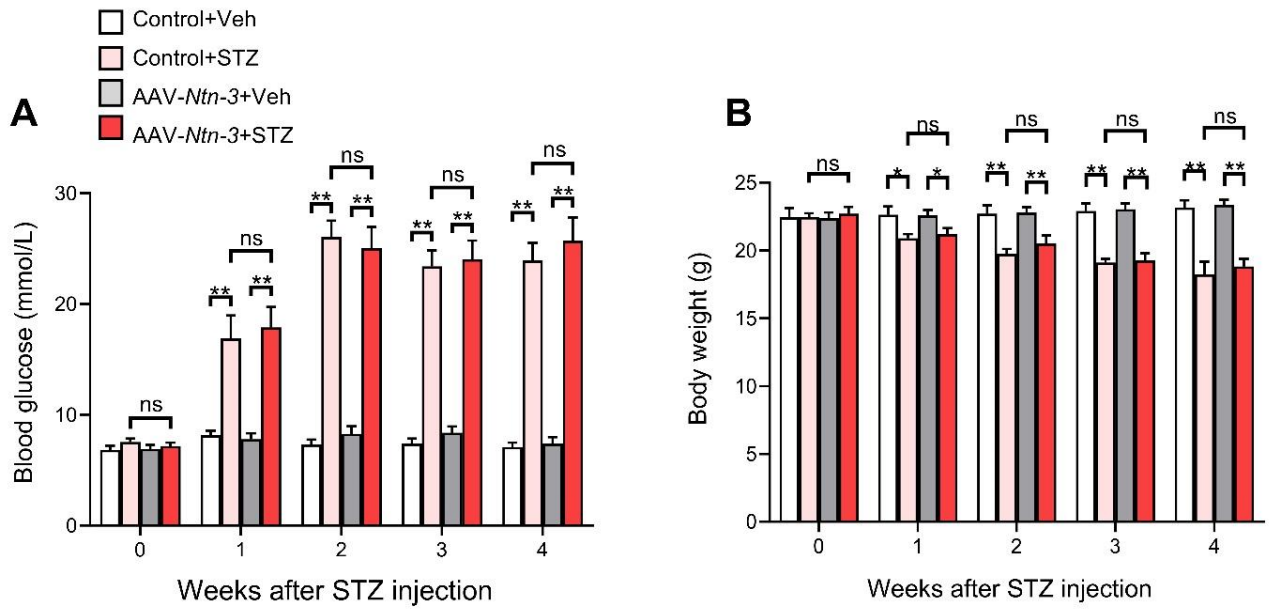

**Fig. S7** Elevation of Ntn-3 expression in mouse DRGs has no effect on STZ-induced diabetic progression.

**A, B** Weekly blood glucose tests (**A**) and body weight measurements (**B**) show that elevation of Ntn-3 expression by AAV-*Ntn-3* has no effect on the progression of hyperglycemia. \* $P < 0.05$ ; \*\* $P < 0.01$ . ns, no significant difference by two-way ANOVA.  $n = 7-13$  per group.



**Table S1** Primers used for qPCR

|                                 |                        |
|---------------------------------|------------------------|
| <i>Ntn-3-F</i>                  | CAAGCCCTTCTACTGCGACA   |
| <i>Ntn-3-R</i>                  | GCAGTGACGACCAGCTGTAT   |
| <i>Ntn-1-F</i>                  | CTCTATAAGCTATCAGGGCG   |
| <i>Ntn-1-R</i>                  | TGGTTTGATTGCAGGTCTT    |
| <i>Ntn-4-F</i>                  | GCAGGCTTGAATGGAGTAGC   |
| <i>Ntn-4-R</i>                  | GCAGCGTTGCATTTATCACAC  |
| <i>IL-1-F</i>                   | ACAACTGCACTACAGGCTCC   |
| <i>IL-1-R</i>                   | TGGGTGTGCCGTCTTTCATT   |
| <i>TGF-<math>\beta</math>-F</i> | ATGGCGCAAAACAGTCCACA   |
| <i>TGF-<math>\beta</math>-R</i> | TGTAACATGCACTGGGATACCA |
| <i>NGF-F</i>                    | CCAGTGAAATTAGGCTCCCTG  |
| <i>NGF-R</i>                    | CCTTGGCAAAACCTTTATTGGG |
| <i>GAPDH-F</i>                  | AGGTCGGTGTGAACGGATTG   |
| <i>GAPDH-R</i>                  | GGGGTCGTTGATGGCAACA    |
